# Supplementary material
Source: HighWire-hosted journal article supplement (https://www.annfammed.org/highwire/filestream/636/field_highwire_adjunct_files/0/Yuet_Supp_App.pdf)
Supplement: Yuet_Supp_App.pdf [file Yuet_Supp_App.pdf]

## Supplemental materials for :

Yuet WC, Gardea J, Ebert D, Martin RD. Pharmacist-led chronic care management services. *Ann Fam Med*. 2019;17(5):465.

**Key words:** chronic care management; clinical pharmacist; revenue cycle management; clinical staff

| <b>Supplemental Table. Current Procedural Terminology (CPT) Codes for Reimbursement of Pharmacist-led Chronic Care Management (CCM)</b> |                 |                                               |                        |                                                                            |
|-----------------------------------------------------------------------------------------------------------------------------------------|-----------------|-----------------------------------------------|------------------------|----------------------------------------------------------------------------|
| <b>CPT Description</b>                                                                                                                  | <b>CPT Code</b> | <b>Minimum Time Requirement</b>               | <b>MDM Requirement</b> | <b>Application in Pharmacist-led CCM</b>                                   |
| Comprehensive assessment of and care planning                                                                                           | G0506           | None                                          | Moderate to complex    | Applied to physician-pharmacist co-care initiating visit                   |
| Chronic care management services                                                                                                        | 99490           | 20 minutes                                    | None                   | Applied to CCM services delivered with or without pharmacist employing MDM |
| Complex chronic care management services                                                                                                | 99487           | 60 minutes                                    | Moderate to complex    | Applied when pharmacists employ moderate to complex MDM through CPA        |
| Add-on for complex chronic care management services                                                                                     | 99489           | 30 minutes (in addition to 99487 requirement) | Moderate to complex    | Applied when pharmacists employ moderate to complex MDM through CPA        |
| CPT=Current Procedural Terminology; CCM=Chronic Care Management; MDM=Medical Decision Making; CPA=Collaborative Practice Agreement      |                 |                                               |                        |                                                                            |

## References

1. Department of Health and Human Services. Centers for Medicare & Medicaid Services. Chronic Care Management Services- Changes for 2017. Available at <https://www.cms.gov/Outreachand-Education/Medicare-Learning-Network-MLN/MLNProducts/Downloads/ChronicCareManagementServicesChanges2017.pdf>. Accessed December 19, 2018.
2. Fixen DR, Linnebur SA, Parnes BL, Vejar MV, Vande JP. Development and economic evaluation of a pharmacist-provided chronic care management service in an ambulatory care geriatrics clinic. *Am J Health-Syst Pharm*. 2018; 75:1805-11.

3. Garwood CL, Korkis B, Mohammad I, Lepczyk M, Risko K. Implementation of chronic care management services in primary care practice. *Am J Health-Syst Pharm*. 2016;73(23): 1924-32.
4. Basu S, Phillips RS, Bitton A, Song Z, Landon BE. Medicare Chronic Care Management Payments and Financial Returns to Primary Care Practices, A Modeling Study. *Ann Intern Med*. 2015;163:580-588.
5. Hwang AY, Gums TH, Gums JG. The benefits of physician-pharmacist collaboration. *J Fam Pract*. 2017;66(12):E1-E8.
